# Supplementary material for: RNA–Mediated Epigenetic Heredity Requires the Cytosine Methyltransferase Dnmt2
Source: PubMed Central journal article supplement (PMC3662642; doi:10.1371/journal.pgen.1003498), 2013-05-23
Supplement: pgen.1003498.s001.pdf [file pgen.1003498.s001.pdf]

A

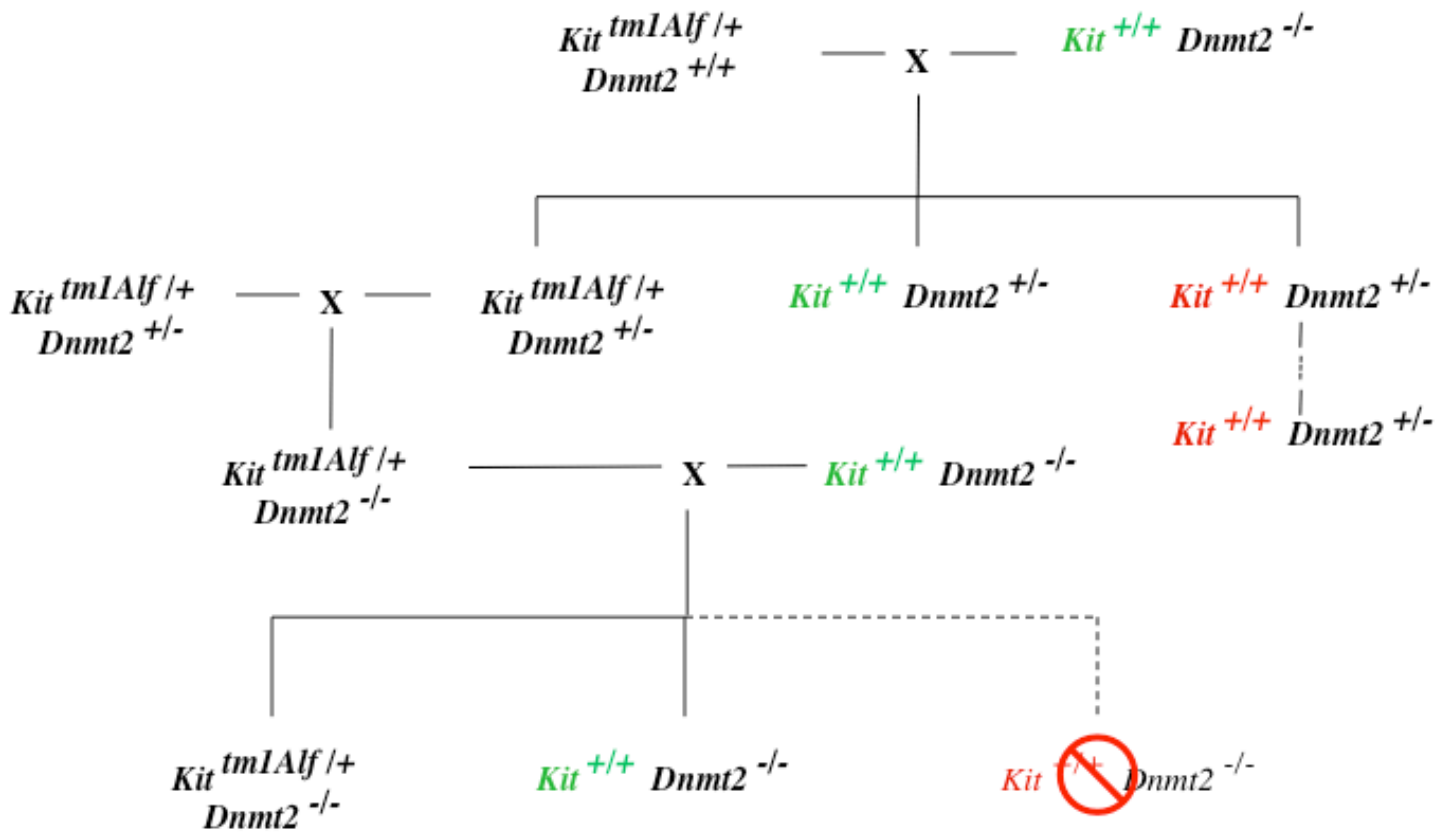

B

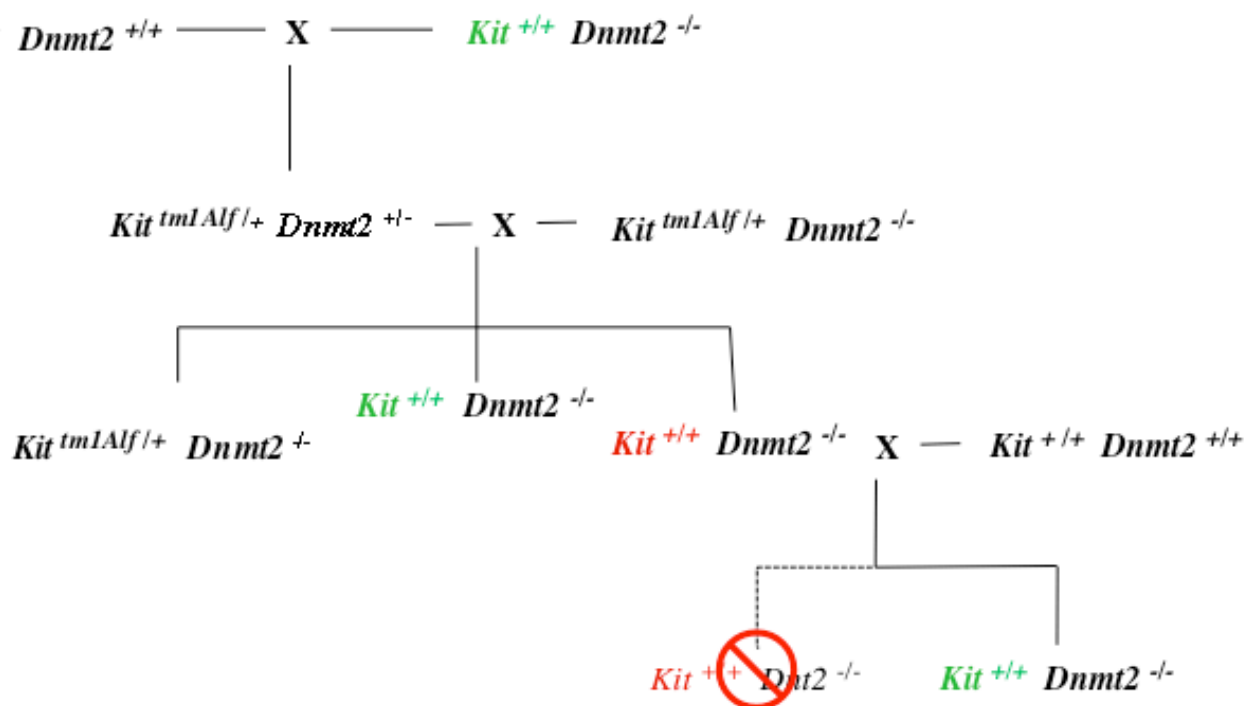

$Kit^{+/+}$  : full tail color     $Kit^{+/+}$  : white tail (Kit\*)
