# Supplementary material for: RNA–Mediated Epigenetic Heredity Requires the Cytosine Methyltransferase Dnmt2
Source: PubMed Central journal article supplement (PMC3662642; doi:10.1371/journal.pgen.1003498), 2013-05-23

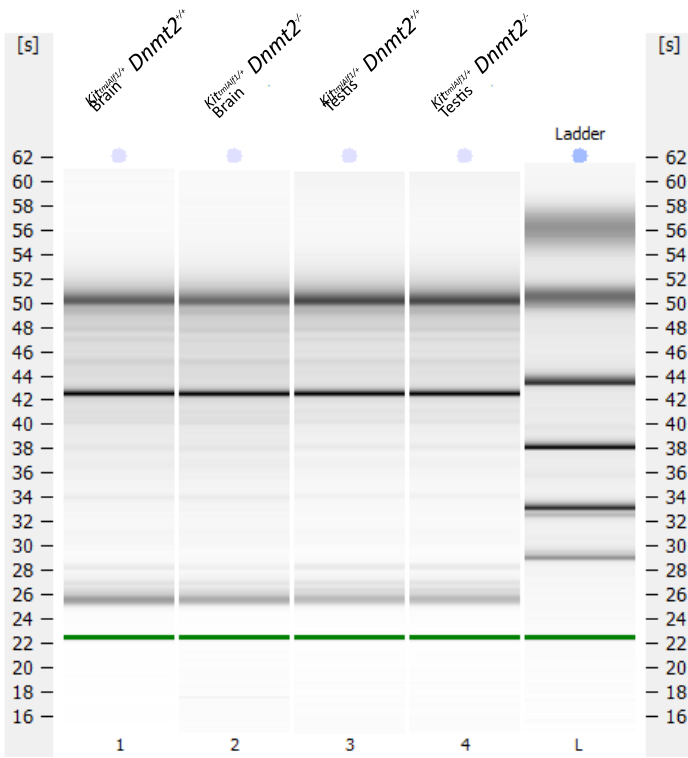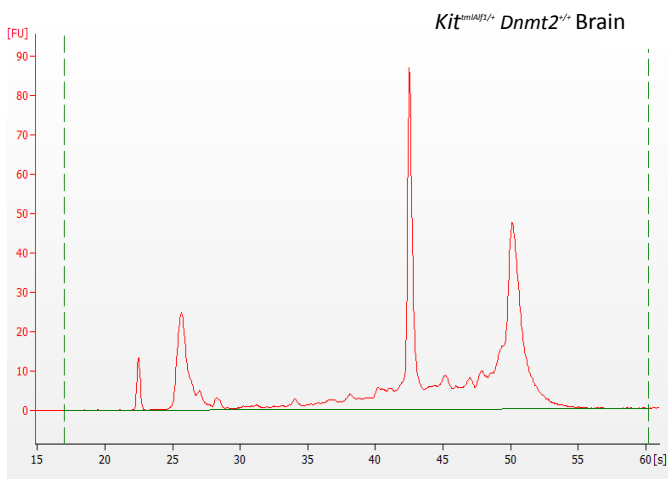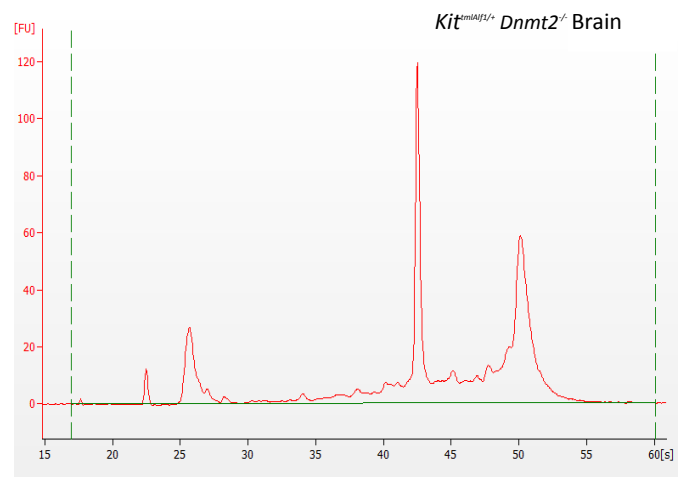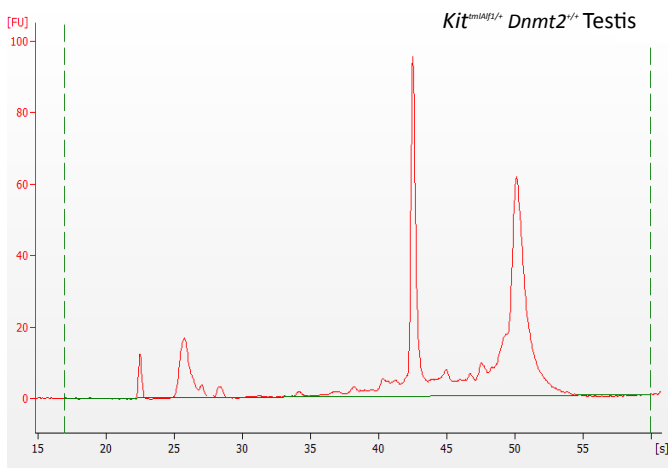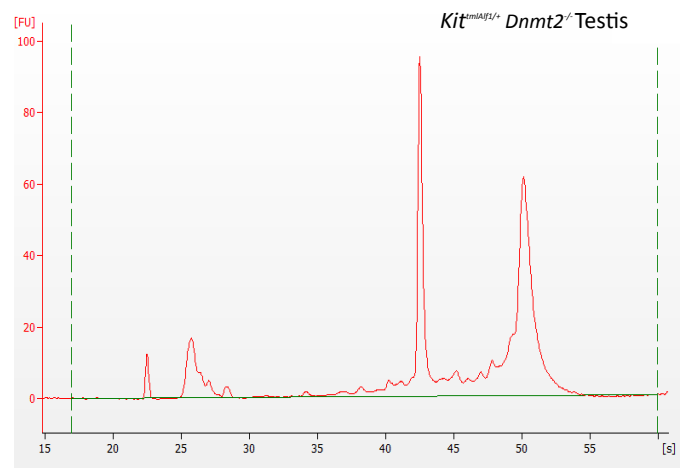

Supplement: pgen.1003498.s002.pdf [file pgen.1003498.s002.pdf]
